# Supplementary material
Source: publisher figshare collection journal article supplement (https://gsajournals.figshare.com/articles/dataset/_/6849047)
Supplement: Supplementary file 3 [file 1]

## Supplementary Tables

**Table S1. Type 1 error rates of omnibus tests in null models of logistic regression when assuming dependent G-E relationship.**

|                     | Dependent G-E        |         |       |
|---------------------|----------------------|---------|-------|
|                     | SNP <sup>a</sup> (N) |         |       |
|                     | 10                   | 100     | 300   |
| (P-value threshold) |                      |         |       |
| $P < 0.5$           | 0.506                | 0.555   | 0.737 |
| $P < 0.1$           | 0.102                | 0.118   | 0.227 |
| $P < 0.05$          | 0.052                | 0.059   | 0.128 |
| $P < 0.01$          | 0.011                | 0.012   | 0.028 |
| $P < 0.005$         | 0.005                | 0.006   | 0.014 |
| $P < 0.0005$        | 4.0E-04              | 7.0E-04 | 0.001 |

<sup>a</sup> Common variants (RAF = 1 – 99%)

**Table S2. Genomic inflation factors ( $\lambda$ ) under the null hypothesis of no interaction for six interaction tests with normally distributed and moderately correlated exposures.**

|                            |                           | Independent G-E |      |                   | Dependent G-E |      |                   |
|----------------------------|---------------------------|-----------------|------|-------------------|---------------|------|-------------------|
|                            |                           | SNP (N)         |      |                   | SNP (N)       |      |                   |
|                            |                           | 10              | 100  | 300               | 10            | 100  | 300               |
| <b>Linear regression</b>   |                           |                 |      |                   |               |      |                   |
| Rare SNP <sup>a</sup>      | Omnibus                   | 1.02            | 0.98 | 0.99              | 0.96          | 0.98 | 1.01              |
|                            | MultiE-uGRS               | 1.04            | 0.98 | 1.00              | 1.04          | 0.97 | 1.02              |
|                            | MultiE-wGRS               | 0.98            | 0.95 | 0.98              | 0.99          | 0.96 | 0.99              |
|                            | MultiSNP-ERS              | 1.02            | 0.96 | 1.01              | 1.00          | 0.98 | 1.02              |
|                            | uGRS-ERS                  | 1.02            | 1.01 | 0.98              | 1.02          | 1.01 | 1.03              |
|                            | wGRS-ERS                  | 1.00            | 1.00 | 1.03              | 1.02          | 1.02 | 1.00              |
| Common SNP <sup>b</sup>    | Omnibus                   | 0.96            | 1.01 | 1.01              | 1.00          | 0.95 | 0.99              |
|                            | MultiE-uGRS               | 1.00            | 1.03 | 1.03              | 1.01          | 1.03 | 1.01              |
|                            | MultiE-wGRS               | 1.00            | 1.03 | 1.03              | 1.00          | 0.98 | 1.01              |
|                            | MultiSNP-ERS              | 1.01            | 1.01 | 0.98              | 1.00          | 0.99 | 0.98              |
|                            | uGRS-ERS                  | 0.98            | 1.04 | 1.02              | 1.00          | 1.01 | 1.03              |
|                            | wGRS-ERS                  | 1.01            | 1.03 | 0.98              | 0.97          | 1.01 | 0.99              |
| <b>Logistic regression</b> |                           |                 |      |                   |               |      |                   |
| Rare SNP <sup>a</sup>      | Omnibus <sup>§</sup>      | 1.13            | 1.58 | 3.56 <sup>c</sup> | 1.12          | 1.59 | 3.28 <sup>c</sup> |
|                            | MultiE-uGRS               | 0.95            | 1.00 | 0.98              | 1.01          | 0.98 | 1.06              |
|                            | MultiE-wGRS               | 1.00            | 0.98 | 1.01              | 1.00          | 0.98 | 1.02              |
|                            | MultiSNP-ERS <sup>§</sup> | 1.05            | 1.19 | 1.65              | 1.00          | 1.20 | 1.55              |
|                            | uGRS-ERS                  | 1.01            | 1.02 | 0.99              | 1.02          | 1.00 | 1.05              |
|                            | wGRS-ERS                  | 0.99            | 1.03 | 0.99              | 0.98          | 0.99 | 1.03              |
| Common SNP <sup>b</sup>    | Omnibus <sup>§</sup>      | 1.05            | 1.28 | 2.67 <sup>c</sup> | 1.04          | 1.26 | 2.80 <sup>c</sup> |
|                            | MultiE-uGRS               | 1.02            | 1.00 | 1.02              | 1.03          | 0.96 | 1.03              |
|                            | MultiE-wGRS               | 1.00            | 0.97 | 1.01              | 1.02          | 1.01 | 0.98              |
|                            | MultiSNP-ERS <sup>§</sup> | 1.04            | 1.07 | 1.39              | 1.05          | 1.06 | 1.42              |
|                            | uGRS-ERS                  | 0.98            | 1.00 | 0.97              | 1.01          | 1.04 | 1.00              |
|                            | wGRS-ERS                  | 1.01            | 0.98 | 0.98              | 0.98          | 0.98 | 1.00              |

<sup>a</sup> Rare SNP: RAF = [0.1-1% or 99-99.9%]

<sup>b</sup> Common SNP: RAF = [1-99%]

<sup>c</sup> 1,000 replicates

**Table S3. Genomic inflation factors ( $\lambda$ ) under the null hypothesis of no interaction for six interaction tests with non-normally distributed and moderately correlated exposures.**

|                            |              | Independent G-E |      |                   | Dependent G-E |      |                   |
|----------------------------|--------------|-----------------|------|-------------------|---------------|------|-------------------|
|                            |              | SNP (N)         |      |                   | SNP (N)       |      |                   |
|                            |              | 10              | 100  | 300               | 10            | 100  | 300               |
| <b>Linear regression</b>   |              |                 |      |                   |               |      |                   |
| Rare SNP <sup>a</sup>      | Omnibus      | 0.98            | 0.99 | 0.99              | 1.02          | 0.99 | 1.02              |
|                            | MultiE-uGRS  | 1.02            | 1.01 | 1.04              | 1.02          | 0.99 | 1.04              |
|                            | MultiE-wGRS  | 1.00            | 0.97 | 1.00              | 1.00          | 0.94 | 0.95              |
|                            | MultiSNP-ERS | 0.95            | 1.00 | 1.01              | 1.03          | 0.98 | 0.97              |
|                            | uGRS-ERS     | 0.98            | 0.99 | 1.01              | 1.02          | 0.97 | 1.02              |
|                            | wGRS-ERS     | 0.99            | 1.01 | 0.96              | 1.00          | 1.01 | 1.01              |
| Common SNP <sup>b</sup>    | Omnibus      | 1.00            | 1.02 | 1.02              | 1.04          | 0.99 | 1.01              |
|                            | MultiE-uGRS  | 1.02            | 1.01 | 0.97              | 1.02          | 1.02 | 0.99              |
|                            | MultiE-wGRS  | 1.00            | 1.01 | 0.96              | 1.06          | 0.99 | 0.99              |
|                            | MultiSNP-ERS | 1.00            | 0.97 | 1.06              | 1.00          | 0.99 | 0.96              |
|                            | uGRS-ERS     | 1.01            | 1.00 | 0.99              | 1.01          | 1.06 | 1.05              |
|                            | wGRS-ERS     | 1.00            | 1.01 | 1.00              | 1.00          | 1.03 | 1.03              |
| <b>Logistic regression</b> |              |                 |      |                   |               |      |                   |
| Rare SNP <sup>a</sup>      | Omnibus      | 1.14            | 1.60 | 3.55 <sup>c</sup> | 1.16          | 1.63 | 3.55 <sup>c</sup> |
|                            | MultiE-uGRS  | 1.00            | 1.01 | 1.03              | 1.05          | 1.00 | 1.00              |
|                            | MultiE-wGRS  | 1.03            | 1.00 | 1.00              | 1.01          | 0.97 | 0.99              |
|                            | MultiSNP-ERS | 1.04            | 1.19 | 1.67              | 1.04          | 1.16 | 1.56              |
|                            | uGRS-ERS     | 0.99            | 1.02 | 1.04              | 1.00          | 1.02 | 0.95              |
|                            | wGRS-ERS     | 0.96            | 1.00 | 1.04              | 1.00          | 1.00 | 0.97              |
| Common SNP <sup>b</sup>    | Omnibus      | 0.98            | 1.22 | 2.93 <sup>c</sup> | 1.00          | 1.31 | 2.82 <sup>c</sup> |
|                            | MultiE-uGRS  | 1.00            | 1.03 | 1.03              | 1.00          | 0.99 | 0.99              |
|                            | MultiE-wGRS  | 0.99            | 1.06 | 0.97              | 0.98          | 0.99 | 1.04              |
|                            | MultiSNP-ERS | 1.01            | 1.03 | 1.42              | 1.00          | 1.05 | 1.37              |
|                            | uGRS-ERS     | 1.01            | 0.99 | 1.00              | 1.01          | 0.97 | 1.02              |
|                            | wGRS-ERS     | 1.03            | 1.00 | 0.98              | 1.01          | 0.98 | 0.96              |

<sup>a</sup> Rare SNP: RAF = [0.1-1% or 99-99.9%]

<sup>b</sup> Common SNP: RAF = [1-99%]

<sup>c</sup> 1,000 replicates

**Table S4. Sample sizes and the numbers of SNPs tested in cohort data (NHS I, NHS II, and HPFS).**

|                               | Sample size (N) |          |        | SNP (N) |
|-------------------------------|-----------------|----------|--------|---------|
|                               | Cases           | Controls | Total  |         |
| (Trait)                       |                 |          |        |         |
| <b>Type 2 diabetes</b>        | 6,150           | 31,512   | 37,662 | 65      |
| <b>Obesity</b>                | 8,909           | 25,534   | 34,443 | 76      |
| <b>Hypertension</b>           | 17,873          | 5,940    | 23,813 | 27      |
| <b>Coronary heart disease</b> | 2,030           | 24,743   | 26,773 | 48      |

**Table S5. Marginal associations of exposures and genetic risk scores with four traits.**

| (Trait)                     | <b>T2D</b><br>( <i>p</i> -value) | <b>Obesity</b><br>( <i>p</i> -value) | <b>Hypertension</b><br>( <i>p</i> -value) | <b>CHD</b><br>( <i>p</i> -value) |
|-----------------------------|----------------------------------|--------------------------------------|-------------------------------------------|----------------------------------|
| <b>Exposure</b>             |                                  |                                      |                                           |                                  |
| HEI (score)                 | 2.7E-32                          | 1.4E-21                              | 6.2E-09                                   | 1.6E-04                          |
| Total calorie intake (kcal) | 1.1E-04                          | 1.9E-03                              | 0.83                                      | 0.43                             |
| MET-hour/week               | 1.6E-23                          | 1.8E-54                              | 1.8E-11                                   | 0.22                             |
| Smoking ever (yes/no)       | 1.1E-04                          | 1.5E-07                              | 1.4E-04                                   | 4.2E-13                          |
| <b>uGRS<sup>a</sup></b>     |                                  |                                      |                                           |                                  |
| T2D                         | 4.1E-20                          | 0.45                                 | 0.37                                      | 0.11                             |
| BMI                         | 4.8E-04                          | 1.9E-13                              | 0.021                                     | 0.30                             |
| Blood pressure              | 0.10                             | 0.14                                 | 1.5E-11                                   | 3.4E-03                          |
| Coronary heart disease      | 0.23                             | 0.63                                 | 4.7E-02                                   | 9.5E-20                          |
| <b>wGRS<sup>a</sup></b>     |                                  |                                      |                                           |                                  |
| T2D                         | 1.0E-23                          | 8.6E-01                              | 0.23                                      | 0.22                             |
| BMI                         | 4.5E-04                          | 4.9E-17                              | 0.015                                     | 0.30                             |
| Blood pressure              | 0.048                            | 0.034                                | 1.8E-10                                   | 0.029                            |
| CHD                         | 0.85                             | 0.17                                 | 0.56                                      | 2.9E-21                          |

Abbreviations: T2D, type 2 diabetes; CHD, coronary heart disease; HEI, healthy eating index, MET, metabolic equivalent for task; BMI, body mass index.

<sup>a</sup>uGRS and wGRS were calculated based on beta coefficients and risk allele counts of top SNPs identified by genome-wide association studies of the four traits listed below.

**Table S6. Correlation coefficients between four exposures.**

| <b>Exposures</b>            | <b>HEI</b> | <b>Total calorie intake</b> | <b>MET-hour/week</b> | <b>Smoking ever</b> |
|-----------------------------|------------|-----------------------------|----------------------|---------------------|
| <b>HEI</b>                  | 1.0        |                             |                      |                     |
| <b>Total calorie intake</b> | -0.08      | 1.0                         |                      |                     |
| <b>MET-hour/week</b>        | 0.17       | 0.06                        | 1.0                  |                     |
| <b>Smoking ever</b>         | 0.04       | -0.03                       | -0.02                | 1.0                 |

Abbreviations: HEI, healthy eating index, MET, metabolic equivalent for task.

**Table S7. Meta-analysis results for 48 loci previously identified to be associated with coronary artery disease.**

| SNP              | CHR | Position    | Gene                       | Effect_allele | Other_allele | Beta <sup>a</sup> | SE <sup>a</sup> | OR (95% CI)       | P-value  |
|------------------|-----|-------------|----------------------------|---------------|--------------|-------------------|-----------------|-------------------|----------|
| rs11206510       | 1   | 55,030,366  | <i>PCSK9</i>               | T             | C            | 0.076961041       | 0.013979068     | 1.08 (1.05, 1.11) | 2.34E-08 |
| rs9970807        | 1   | 56,499,992  | <i>PPAP2B</i>              | C             | T            | 0.122217633       | 0.017748018     | 1.13 (1.10, 1.17) | 5.00E-14 |
| rs7528419        | 1   | 109,274,570 | <i>SORT1</i>               | A             | G            | 0.113328685       | 0.013486356     | 1.12 (1.10, 1.15) | 1.97E-23 |
| rs6689306        | 1   | 154,423,470 | <i>IL6R</i>                | A             | G            | 0.058268908       | 0.009536803     | 1.06 (1.04, 1.08) | 2.60E-09 |
| rs67180937       | 1   | 222,650,401 | <i>MIA3</i>                | G             | T            | 0.076961041       | 0.013979068     | 1.08 (1.06, 1.11) | 1.01E-12 |
| rs16986953       | 2   | 19,742,712  | <i>AK097927</i>            | A             | G            | 0.086177696       | 0.013852545     | 1.09 (1.06, 1.12) | 1.45E-08 |
| chr2:21378433:D  | 2   | 21,378,433  | <i>APOB</i>                | D             | I            | 0.067658648       | 0.014107924     | 1.07 (1.04, 1.10) | 2.89E-08 |
| chr2:44074126:D  | 2   | 44,074,126  | <i>ABCG5-ABCG8</i>         | I             | D            | 0.058268908       | 0.014239178     | 1.06 (1.04, 1.09) | 2.60E-08 |
| rs7568458        | 2   | 85,561,052  | <i>VAMP5-VAMP8-GGCX</i>    | A             | T            | 0.058268908       | 0.009536803     | 1.06 (1.04, 1.08) | 3.62E-10 |
| rs17678683       | 2   | 144,528,992 | <i>ZEB2-ACO74093.1</i>     | G             | T            | 0.09531018        | 0.018223512     | 1.10 (1.07, 1.14) | 3.00E-09 |
| chr2:203828796:I | 2   | 203,828,796 | <i>WDR12</i>               | I             | D            | 0.139761942       | 0.013139029     | 1.15 (1.11, 1.18) | 2.15E-18 |
| chr3:138099161:I | 3   | 138,099,161 | <i>MRAS</i>                | I             | D            | 0.076961041       | 0.009361805     | 1.08 (1.05, 1.10) | 2.89E-09 |
| rs4593108        | 4   | 147,359,849 | <i>EDNRA</i>               | C             | G            | 0.067658648       | 0.014107924     | 1.07 (1.05, 1.10) | 8.82E-10 |
| rs72689147       | 4   | 155,718,736 | <i>GUCY1A3</i>             | G             | T            | 0.067658648       | 0.014107924     | 1.07 (1.05, 1.10) | 6.07E-09 |
| rs273909         | 5   | 132,331,660 | <i>SLC22A4-SLC22A5</i>     | G             | A            | 0.058268908       | 0.014239178     | 1.06 (1.03, 1.09) | 1.24E-04 |
| rs6903956        | 6   | 11,774,350  | <i>ADTRP-C6orf105</i>      | A             | G            | 0                 | 0.010103381     | 1.00 (0.98, 1.02) | 0.96     |
| rs9349379        | 6   | 12,903,725  | <i>PHACTR1</i>             | G             | A            | 0.131028262       | 0.008873338     | 1.14 (1.12, 1.16) | 1.81E-42 |
| rs17609940       | 6   | 35,067,023  | <i>ANKS1A</i>              | G             | C            | 0.029558802       | 0.009811919     | 1.03 (1.00, 1.05) | 0.03     |
| rs56336142       | 6   | 39,166,323  | <i>KCNK5</i>               | T             | C            | 0.067658648       | 0.009448494     | 1.07 (1.04, 1.09) | 1.85E-08 |
| rs12202017       | 6   | 133,852,013 | <i>TCF21</i>               | A             | G            | 0.067658648       | 0.009448494     | 1.07 (1.05, 1.09) | 1.98E-11 |
| rs55730499       | 6   | 160,584,578 | <i>SLC22A3-LPAL2-LPA</i>   | T             | C            | 0.31481074        | 0.02542468      | 1.37 (1.31, 1.44) | 5.39E-39 |
| rs4252185        | 6   | 160,702,419 | <i>PLG</i>                 | C             | T            | 0.292669614       | 0.025979638     | 1.34 (1.28, 1.41) | 1.64E-32 |
| rs2107595        | 7   | 19,009,765  | <i>HDAC9</i>               | A             | G            | 0.076961041       | 0.009361805     | 1.08 (1.05, 1.10) | 8.05E-11 |
| rs10953541       | 7   | 107,604,100 | <i>7q22</i>                | C             | T            | 0.048790164       | 0.014372896     | 1.05 (1.03, 1.08) | 1.02E-05 |
| rs11556924       | 7   | 130,023,656 | <i>ZC3HC1</i>              | C             | T            | 0.076961041       | 0.009361805     | 1.08 (1.05, 1.10) | 5.34E-11 |
| rs264            | 8   | 19,955,669  | <i>LPL</i>                 | G             | A            | 0.058268908       | 0.014239178     | 1.06 (1.03, 1.09) | 1.06E-05 |
| rs2954029        | 8   | 125,478,730 | <i>TRIB1</i>               | A             | T            | 0.039220713       | 0.009718467     | 1.04 (1.03, 1.06) | 2.61E-06 |
| rs2891168        | 9   | 22,098,620  | <i>9p21</i>                | G             | A            | 0.19062036        | 0.012495418     | 1.21 (1.19, 1.24) | 2.29E-98 |
| rs2519093        | 9   | 133,266,456 | <i>ABO</i>                 | T             | C            | 0.076961041       | 0.013979068     | 1.08 (1.06, 1.11) | 1.19E-11 |
| rs2487928        | 10  | 30,034,963  | <i>KIAA1462</i>            | A             | G            | 0.058268908       | 0.009536803     | 1.06 (1.04, 1.08) | 4.41E-11 |
| rs1870634        | 10  | 43,985,363  | <i>CXCL12</i>              | G             | T            | 0.076961041       | 0.009361805     | 1.08 (1.06, 1.10) | 5.55E-15 |
| rs1412444        | 10  | 89,243,170  | <i>LIPA</i>                | T             | C            | 0.067658648       | 0.009448494     | 1.07 (1.05, 1.09) | 5.15E-12 |
| rs11191416       | 10  | 102,845,159 | <i>CYP17A1-CNNM2-NT5C2</i> | T             | G            | 0.076961041       | 0.013979068     | 1.08 (1.05, 1.11) | 4.65E-09 |
| rs2128739        | 11  | 103,802,549 | <i>PDGFD</i>               | A             | C            | 0.067658648       | 0.009448494     | 1.07 (1.05, 1.09) | 7.05E-11 |
| rs964184         | 11  | 116,778,201 | <i>ZNF259-APOA5-APOA1</i>  | G             | C            | 0.048790164       | 0.014372896     | 1.05 (1.03, 1.08) | 5.60E-05 |
| rs2681472        | 12  | 89,615,182  | <i>ATP2B1</i>              | G             | A            | 0.076961041       | 0.009361805     | 1.08 (1.05, 1.10) | 6.17E-11 |
| rs3184504        | 12  | 111,446,804 | <i>SH2B3</i>               | T             | C            | 0.067658648       | 0.009448494     | 1.07 (1.04, 1.09) | 1.03E-09 |
| rs9319428        | 13  | 28,399,484  | <i>FLT1</i>                | A             | G            | 0.039220713       | 0.009718467     | 1.04 (1.02, 1.06) | 7.13E-05 |
| rs11838776       | 13  | 110,388,334 | <i>COL4A1/A2</i>           | A             | G            | 0.067658648       | 0.009448494     | 1.07 (1.05, 1.09) | 1.83E-10 |
| rs10139550       | 14  | 99,679,373  | <i>HHLPL1</i>              | G             | C            | 0.058268908       | 0.009536803     | 1.06 (1.04, 1.08) | 1.38E-08 |
| rs4468572        | 15  | 78,832,133  | <i>ADAMTS7</i>             | C             | T            | 0.076961041       | 0.009361805     | 1.08 (1.06, 1.10) | 4.44E-16 |

|            |    |            |                            |   |   |             |             |                   |          |
|------------|----|------------|----------------------------|---|---|-------------|-------------|-------------------|----------|
| rs17514846 | 15 | 90,873,320 | <i>FURIN-FES</i>           | A | C | 0.048790164 | 0.009626778 | 1.05 (1.03, 1.07) | 3.10E-07 |
| rs216172   | 17 | 2,223,210  | <i>SMG6</i>                | C | G | 0.048790164 | 0.009626778 | 1.05 (1.03, 1.07) | 5.07E-07 |
| rs12936587 | 17 | 17,640,408 | <i>RAI1-PEMT-RASD1</i>     | G | A | 0.029558802 | 0.009811919 | 1.03 (1.01, 1.05) | 8.24E-04 |
| rs46522    | 17 | 48,911,235 | <i>UBE2Z</i>               | T | C | 0.039220713 | 0.009718467 | 1.04 (1.02, 1.06) | 1.84E-05 |
| rs56289821 | 19 | 11,077,571 | <i>LDLR</i>                | G | A | 0.131028262 | 0.017594988 | 1.14 (1.11, 1.18) | 4.44E-15 |
| rs4420638  | 19 | 44,919,689 | <i>APOE-APOC1</i>          | G | A | 0.09531018  | 0.013728292 | 1.10 (1.07, 1.13) | 7.07E-11 |
| rs28451064 | 21 | 34,221,526 | <i>KCNE2 (gene desert)</i> | A | G | 0.131028262 | 0.013252799 | 1.14 (1.10, 1.17) | 1.33E-15 |

This GWAS meta-analysis was conducted among 185,000 coronary artery disease cases and controls and the majority (77%) were European ancestry (Nikpay et al. 2015).

<sup>a</sup>Beta and SE were estimated using OR and 95% CI.



**Table S8. Meta-analysis results of 65 novel and established susceptible loci to the risk of type 2 diabetes.**

| SNP        | CHR | Position    | Gene                 | Risk_allele | Other_allele | Beta <sup>a</sup> | SE <sup>a</sup> | OR (95% CI)      | P-value  |
|------------|-----|-------------|----------------------|-------------|--------------|-------------------|-----------------|------------------|----------|
| rs10923931 | 1   | 120,319,482 | <i>NOTCH2</i>        | T           | G            | 0.09531018        | 0.031476311     | 1.10 (1.04-1.17) | 5.8E-04  |
| rs2075423  | 1   | 212,221,342 | <i>PROX1</i>         | G           | T            | 0.076961041       | 0.01855492      | 1.08 (1.04-1.12) | 1.6E-04  |
| rs780094   | 2   | 27,594,741  | <i>GCKR</i>          | C           | T            | 0.039220713       | 0.019255269     | 1.04 (1.00-1.08) | 3.2E-02  |
| rs10203174 | 2   | 43,543,534  | <i>THADA</i>         | C           | T            | 0.139761942       | 0.025948172     | 1.15 (1.08-1.21) | 4.7E-06  |
| rs243019   | 2   | 60,439,310  | <i>BCL11A</i>        | C           | T            | 0.086177696       | 0.013852545     | 1.09 (1.05-1.12) | 8.2E-06  |
| rs7593730  | 2   | 160,879,700 | <i>RBMS1</i>         | C           | T            | 0.104360015       | 0.018062208     | 1.11 (1.06-1.15) | 4.3E-06  |
| rs13389219 | 2   | 165,237,122 | <i>GRB14</i>         | C           | T            | 0.048790164       | 0.019075271     | 1.05 (1.01-1.09) | 1.3E-02  |
| rs7578326  | 2   | 226,728,897 | <i>IRS1</i>          | A           | G            | 0.09531018        | 0.022679471     | 1.10 (1.06-1.15) | 4.3E-06  |
| rs1801282  | 3   | 12,368,125  | <i>PPARG</i>         | C           | G            | 0.148420005       | 0.029894982     | 1.16 (1.10-1.23) | 1.7E-08  |
| rs1496653  | 3   | 23,429,794  | <i>UBE2E2</i>        | A           | G            | 0.076961041       | 0.023090098     | 1.08 (1.04-1.13) | 3.0E-04  |
| rs12497268 | 3   | 64,065,403  | <i>PSMD6</i>         | G           | C            | 0.039220713       | 0.023957644     | 1.04 (1.00-1.09) | 6.6E-02  |
| rs6795735  | 3   | 64,680,405  | <i>ADAMTS9</i>       | C           | T            | 0.067658648       | 0.014107924     | 1.07 (1.03-1.10) | 4.4E-04  |
| rs11708067 | 3   | 124,548,468 | <i>ADCY5</i>         | A           | G            | 0.09531018        | 0.022679471     | 1.10 (1.06-1.15) | 1.1E-05  |
| rs4402960  | 3   | 186,994,381 | <i>IGF2BP2</i>       | T           | G            | 0.122217633       | 0.017748018     | 1.13 (1.09-1.17) | 1.8E-10  |
| rs17301514 | 3   | 188,096,103 | <i>ST6GAL1</i>       | A           | G            | 0.104360015       | 0.039776297     | 1.11 (1.03-1.20) | 5.8E-03  |
| rs6819243  | 4   | 1,283,245   | <i>MAEA</i>          | T           | C            | 0.104360015       | 0.060603845     | 1.11 (0.99-1.25) | 8.4E-02  |
| rs4458523  | 4   | 6,340,887   | <i>WFS1</i>          | G           | T            | 0.086177696       | 0.018387723     | 1.09 (1.06-1.13) | 5.7E-07  |
| rs459193   | 5   | 55,842,508  | <i>ANKRD55</i>       | G           | A            | 0.048790164       | 0.023734702     | 1.05 (1.01-1.10) | 2.7E-02  |
| rs4457053  | 5   | 76,460,705  | <i>ZBED3</i>         | G           | A            | 0.122217633       | 0.026395752     | 1.13 (1.08-1.19) | 1.5E-06  |
| rs9368222  | 6   | 20,794,975  | <i>CDKAL1</i>        | A           | C            | 0.19062036        | 0.016593465     | 1.21 (1.16-1.25) | 9.2E-22  |
| rs4299828  | 6   | 38,285,645  | <i>ZFAND3</i>        | A           | G            | 0.058268908       | 0.018898608     | 1.06 (1.01-1.10) | 1.3E-02  |
| rs3734621  | 6   | 39,412,189  | <i>KCNK16</i>        | C           | A            | 0.09531018        | 0.056991831     | 1.10 (0.99-1.23) | 8.4E-02  |
| rs6960043  | 7   | 15,019,385  | <i>DGKB</i>          | C           | T            | 0.067658648       | 0.018725187     | 1.07 (1.03-1.11) | 1.7E-04  |
| rs849135   | 7   | 28,162,938  | <i>JAZF1</i>         | G           | A            | 0.113328685       | 0.022283196     | 1.12 (1.08-1.17) | 1.90E-09 |
| rs10278336 | 7   | 44,211,888  | <i>GCK</i>           | A           | G            | 0.048790164       | 0.019075271     | 1.05 (1.01-1.09) | 2.60E-02 |
| rs17867832 | 7   | 126,784,073 | <i>GCC1</i>          | T           | G            | 0.09531018        | 0.031476311     | 1.10 (1.03-1.17) | 3.90E-03 |
| rs13233731 | 7   | 130,088,229 | <i>KLF14</i>         | G           | A            | 0.09531018        | 0.013728292     | 1.10 (1.06-1.13) | 1.70E-07 |
| rs516946   | 8   | 41,638,405  | <i>ANK1</i>          | C           | T            | 0.09531018        | 0.022679471     | 1.10 (1.06-1.15) | 2.10E-06 |
| rs896854   | 8   | 96,029,687  | <i>TP53INP1</i>      | T           | C            | 0.086177696       | 0.018387723     | 1.09 (1.05-1.13) | 1.40E-05 |
| rs3802177  | 8   | 118,254,206 | <i>SLC30A8</i>       | G           | A            | 0.148420005       | 0.025730027     | 1.16 (1.11-1.22) | 1.30E-10 |
| rs10758593 | 9   | 4,282,083   | <i>GLIS3</i>         | A           | G            | 0.058268908       | 0.023515871     | 1.06 (1.02-1.11) | 1.30E-03 |
| rs16927668 | 9   | 8,359,533   | <i>PTPRD</i>         | T           | C            | 0.039220713       | 0.019255269     | 1.04 (0.99-1.08) | 1.40E-01 |
| rs10811661 | 9   | 22,124,094  | <i>CDKN2A/B</i>      | T           | C            | 0.165514438       | 0.025304562     | 1.18 (1.13-1.24) | 1.20E-12 |
| rs17791513 | 9   | 81,095,410  | <i>TLE4</i>          | A           | G            | 0.19062036        | 0.040513662     | 1.21 (1.13-1.31) | 4.30E-07 |
| rs2796441  | 9   | 83,498,768  | <i>TLE1</i>          | G           | A            | 0.067658648       | 0.023301039     | 1.07 (1.03-1.12) | 4.80E-04 |
| rs12779790 | 10  | 12,368,016  | <i>CDC123/CAMK1D</i> | G           | A            | 0.076961041       | 0.023090098     | 1.08 (1.03-1.13) | 2.00E-03 |
| rs12242953 | 10  | 70,535,348  | <i>VPS26A</i>        | G           | A            | 0.104360015       | 0.039776297     | 1.11 (1.04-1.20) | 3.30E-03 |
| rs12571751 | 10  | 80,612,637  | <i>ZMIZ1</i>         | A           | G            | 0.086177696       | 0.018387723     | 1.09 (1.06-1.13) | 7.00E-07 |
| rs5015480  | 10  | 94,455,539  | <i>HHEX/IDE</i>      | C           | T            | 0.139761942       | 0.017444574     | 1.15 (1.11-1.19) | 5.40E-15 |
| rs7903146  | 10  | 114,748,339 | <i>TCF7L2</i>        | T           | C            | 0.336472237       | 0.021410306     | 1.40 (1.35-1.46) | 1.80E-59 |
| rs2334499  | 11  | 1,653,425   | <i>DUSP8</i>         | T           | C            | 0.067658648       | 0.018725187     | 1.07 (1.03-1.11) | 1.30E-03 |

|            |    |             |                |   |   |             |             |                  |          |
|------------|----|-------------|----------------|---|---|-------------|-------------|------------------|----------|
| rs231362   | 11 | 2,648,047   | KCNQ1          | G | A | 0.104360015 | 0.022479587 | 1.11 (1.07-1.16) | 5.80E-07 |
| rs5215     | 11 | 17,365,206  | KCNJ11         | C | T | 0.076961041 | 0.01855492  | 1.08 (1.04-1.12) | 1.10E-05 |
| rs1552224  | 11 | 72,110,746  | ARAP1 (CENTD2) | A | C | 0.122217633 | 0.026395752 | 1.13 (1.08-1.19) | 1.50E-06 |
| rs10830963 | 11 | 92,348,358  | MTNR1B         | G | C | 0.104360015 | 0.022479587 | 1.11 (1.06-1.16) | 2.40E-06 |
| rs11063069 | 12 | 4,244,634   | CCND2          | G | A | 0.09531018  | 0.022679471 | 1.10 (1.04-1.15) | 3.20E-04 |
| rs10842994 | 12 | 27,856,417  | KLHDC5         | C | T | 0.086177696 | 0.018387723 | 1.09 (1.04-1.13) | 3.00E-04 |
| rs2261181  | 12 | 64,498,585  | HMG2           | T | C | 0.148420005 | 0.029894982 | 1.16 (1.10-1.23) | 3.90E-07 |
| rs7955901  | 12 | 69,719,560  | TSPAN8/LGR5    | C | T | 0.086177696 | 0.018387723 | 1.09 (1.05-1.13) | 9.00E-06 |
| rs12427353 | 12 | 119,911,284 | HNF1A (TCF1)   | G | C | 0.113328685 | 0.026625384 | 1.12 (1.07-1.18) | 2.80E-06 |
| rs1359790  | 13 | 79,615,157  | SPRY2          | G | A | 0.09531018  | 0.018223512 | 1.10 (1.05-1.14) | 3.10E-06 |
| rs4502156  | 15 | 60,170,447  | C2CD4A         | T | C | 0.058268908 | 0.023515871 | 1.06 (1.02-1.11) | 1.90E-03 |
| rs7177055  | 15 | 75,619,817  | HMG20A         | A | G | 0.076961041 | 0.01855492  | 1.08 (1.04-1.12) | 1.2E-04  |
| rs11634397 | 15 | 78,219,277  | ZFAND6         | G | A | 0.086177696 | 0.018387723 | 1.09 (1.05-1.13) | 1.80E-05 |
| rs2028299  | 15 | 88,175,261  | AP3S2          | C | A | 0.039220713 | 0.023957644 | 1.04 (1.00-1.09) | 4.40E-02 |
| rs8042680  | 15 | 89,322,341  | PRC1           | A | C | 0.067658648 | 0.018725187 | 1.07 (1.03-1.11) | 2.00E-04 |
| rs9936385  | 16 | 52,376,670  | FTO            | C | T | 0.122217633 | 0.022090207 | 1.13 (1.09-1.18) | 3.20E-10 |
| rs7202877  | 16 | 73,804,746  | BCAR1          | T | G | 0.139761942 | 0.034312361 | 1.15 (1.07-1.23) | 5.00E-05 |
| rs2447090  | 17 | 2,245,724   | SRR            | A | G | 0.029558802 | 0.019438697 | 1.03 (0.99-1.07) | 2.00E-01 |
| rs4430796  | 17 | 33,172,153  | HNF1B (TCF2)   | G | A | 0.122217633 | 0.026395752 | 1.13 (1.07-1.19) | 6.50E-06 |
| rs12970134 | 18 | 56,035,730  | MC4R           | A | G | 0.076961041 | 0.01855492  | 1.08 (1.03-1.12) | 2.30E-04 |
| rs10401969 | 19 | 19,268,718  | CILP2          | C | T | 0.122217633 | 0.03489935  | 1.13 (1.05-1.21) | 9.20E-04 |
| rs3786897  | 19 | 38,584,848  | PEPD           | A | G | 0.019802627 | 0.019625653 | 1.02 (0.98-1.06) | 3.30E-01 |
| rs8108269  | 19 | 50,850,353  | GIPR           | G | T | 0.058268908 | 0.023515871 | 1.06 (1.02-1.11) | 5.00E-03 |
| rs4812829  | 20 | 42,422,681  | HNF4A          | A | G | 0.067658648 | 0.023301039 | 1.07 (1.01-1.12) | 1.20E-02 |

This meta-analysis was conducted in 12,171 type 2 diabetes cases and 56,862 controls of European descent (Morris et al. 2012).

<sup>a</sup>Beta and SE were estimated using OR and 95% CI.

**Table S9. European meta-analysis results of 77 body mass index loci reaching genome-wide significance.**

| SNP        | CHR | Position    | Gene        | Effect_allele | Other_allele | Beta <sup>a</sup> | SE <sup>a</sup> | P-value  |
|------------|-----|-------------|-------------|---------------|--------------|-------------------|-----------------|----------|
| rs657452   | 1   | 49,362,434  | AGBL4       | A             | G            | 0.023             | 0.003           | 5.48E-13 |
| rs11583200 | 1   | 50,332,407  | ELAVL4      | C             | T            | 0.018             | 0.003           | 1.48E-08 |
| rs3101336  | 1   | 72,523,773  | NEGR1       | C             | T            | 0.033             | 0.003           | 2.66E-26 |
| rs12566985 | 1   | 74,774,781  | FPGT-TNNI3K | G             | A            | 0.024             | 0.003           | 3.28E-15 |
| rs12401738 | 1   | 78,219,349  | FUBP1       | A             | G            | 0.021             | 0.003           | 1.15E-10 |
| rs11165643 | 1   | 96,696,685  | PTBP2       | T             | C            | 0.022             | 0.003           | 2.07E-12 |
| rs17024393 | 1   | 109,956,211 | GNAT2       | C             | T            | 0.066             | 0.009           | 7.03E-14 |
| rs543874   | 1   | 176,156,103 | SEC16B      | G             | A            | 0.048             | 0.004           | 2.62E-35 |
| rs2820292  | 1   | 200,050,910 | NAV1        | C             | A            | 0.020             | 0.003           | 1.83E-10 |
| rs13021737 | 2   | 622,348     | TMEM18      | G             | A            | 0.060             | 0.004           | 1.11E-50 |
| rs10182181 | 2   | 25,003,800  | ADCY3       | G             | A            | 0.031             | 0.003           | 8.78E-24 |
| rs11126666 | 2   | 26,782,315  | KCNK3       | A             | G            | 0.021             | 0.003           | 1.33E-09 |
| rs1016287  | 2   | 59,159,129  | LINC01122   | T             | C            | 0.023             | 0.003           | 2.25E-11 |
| rs11688816 | 2   | 62,906,552  | EHBP1       | G             | A            | 0.017             | 0.003           | 1.89E-08 |
| rs2121279  | 2   | 142,759,755 | LRP1B       | T             | C            | 0.025             | 0.004           | 2.31E-08 |
| rs1528435  | 2   | 181,259,207 | UBE2E3      | T             | C            | 0.018             | 0.003           | 1.20E-08 |
| rs7599312  | 2   | 213,121,476 | ERBB4       | G             | A            | 0.022             | 0.003           | 1.17E-10 |
| rs6804842  | 3   | 25,081,441  | RARB        | G             | A            | 0.019             | 0.003           | 2.48E-09 |
| rs2365389  | 3   | 61,211,502  | FHIT        | C             | T            | 0.020             | 0.003           | 1.63E-10 |
| rs3849570  | 3   | 81,874,802  | GBE1        | A             | C            | 0.019             | 0.003           | 2.60E-08 |
| rs13078960 | 3   | 85,890,280  | CADM2       | G             | T            | 0.030             | 0.004           | 1.74E-14 |
| rs16851483 | 3   | 142,758,126 | RASA2       | T             | G            | 0.048             | 0.008           | 3.55E-10 |
| rs1516725  | 3   | 187,306,698 | ETV5        | C             | T            | 0.045             | 0.005           | 1.89E-22 |
| rs10938397 | 4   | 44,877,284  | GNPDA2      | G             | A            | 0.040             | 0.003           | 3.21E-38 |
| rs17001654 | 4   | 77,348,592  | SCARB2      | G             | C            | 0.031             | 0.005           | 7.76E-09 |
| rs13107325 | 4   | 103,407,732 | SLC39A8     | T             | C            | 0.048             | 0.007           | 1.83E-12 |
| rs11727676 | 4   | 145,878,514 | HHIP        | T             | C            | 0.036             | 0.006           | 2.55E-08 |
| rs2112347  | 5   | 75,050,998  | POC5        | T             | G            | 0.026             | 0.003           | 6.19E-17 |
| rs205262   | 6   | 34,671,142  | C6orf106    | G             | A            | 0.022             | 0.004           | 1.75E-10 |
| rs2033529  | 6   | 40,456,631  | TDRG1       | G             | A            | 0.019             | 0.003           | 1.39E-08 |
| rs2207139  | 6   | 50,953,449  | TFAP2B      | G             | A            | 0.045             | 0.004           | 4.13E-29 |
| rs9400239  | 6   | 109,084,356 | FOXO3       | C             | T            | 0.019             | 0.003           | 1.61E-08 |
| rs13191362 | 6   | 162,953,340 | PARK2       | A             | G            | 0.028             | 0.005           | 7.34E-09 |
| rs1167827  | 7   | 75,001,105  | HIP1        | G             | A            | 0.020             | 0.003           | 6.33E-10 |
| rs2245368  | 7   | 76,446,079  | PMS2L11     | C             | T            | 0.032             | 0.006           | 3.19E-08 |
| rs17405819 | 8   | 76,969,139  | HNF4G       | T             | C            | 0.022             | 0.003           | 2.07E-11 |
| rs2033732  | 8   | 85,242,264  | RALYL       | C             | T            | 0.019             | 0.004           | 4.89E-08 |
| rs4740619  | 9   | 15,624,326  | C9orf93     | T             | C            | 0.018             | 0.003           | 4.56E-09 |
| rs10968576 | 9   | 28,404,339  | LINGO2      | G             | A            | 0.025             | 0.003           | 6.61E-14 |
| rs6477694  | 9   | 110,972,163 | EPB41L4B    | C             | T            | 0.017             | 0.003           | 2.67E-08 |
| rs1928295  | 9   | 119,418,304 | TLR4        | T             | C            | 0.019             | 0.003           | 7.91E-10 |

|            |    |             |                 |   |   |       |       |           |
|------------|----|-------------|-----------------|---|---|-------|-------|-----------|
| rs10733682 | 9  | 128,500,735 | <i>LMX1B</i>    | A | G | 0.017 | 0.003 | 1.83E-08  |
| rs7899106  | 10 | 87,400,884  | <i>GRID1</i>    | G | A | 0.040 | 0.007 | 2.96E-08  |
| rs17094222 | 10 | 102,385,430 | <i>HIF1AN</i>   | C | T | 0.025 | 0.004 | 5.94E-11  |
| rs11191560 | 10 | 104,859,028 | <i>NT5C2</i>    | C | T | 0.031 | 0.005 | 8.45E-09  |
| rs7903146  | 10 | 114,748,339 | <i>TCF7L2</i>   | C | T | 0.023 | 0.003 | 1.11E-11  |
| rs4256980  | 11 | 8,630,515   | <i>TRIM66</i>   | G | C | 0.021 | 0.003 | 2.90E-11  |
| rs11030104 | 11 | 27,641,093  | <i>BDNF</i>     | A | G | 0.041 | 0.004 | 5.56E-28  |
| rs2176598  | 11 | 43,820,854  | <i>HSD17B12</i> | T | C | 0.020 | 0.004 | 2.97E-08  |
| rs3817334  | 11 | 47,607,569  | <i>MTCH2</i>    | T | C | 0.026 | 0.003 | 5.15E-17  |
| rs12286929 | 11 | 114,527,614 | <i>CADM1</i>    | G | A | 0.022 | 0.003 | 1.31E-12  |
| rs7138803  | 12 | 48,533,735  | <i>BCDIN3D</i>  | A | G | 0.032 | 0.003 | 8.15E-24  |
| rs11057405 | 12 | 121,347,850 | <i>CLIP1</i>    | G | A | 0.031 | 0.006 | 2.02E-08  |
| rs12016871 | 13 | 26,915,782  | <i>MTIF3</i>    | T | C | 0.030 | 0.005 | 2.29E-10  |
| rs12429545 | 13 | 53,000,207  | <i>OLFM4</i>    | A | G | 0.033 | 0.005 | 1.09E-12  |
| rs10132280 | 14 | 24,998,019  | <i>STXBP6</i>   | C | A | 0.023 | 0.003 | 1.14E-11  |
| rs12885454 | 14 | 28,806,589  | <i>PRKD1</i>    | C | A | 0.021 | 0.003 | 1.94E-10  |
| rs11847697 | 14 | 29,584,863  | <i>PRKD1</i>    | T | C | 0.049 | 0.008 | 3.99E-09  |
| rs7141420  | 14 | 78,969,207  | <i>NRXN3</i>    | T | C | 0.024 | 0.003 | 1.23E-14  |
| rs3736485  | 15 | 49,535,902  | <i>DMXL2</i>    | A | G | 0.018 | 0.003 | 7.41E-09  |
| rs16951275 | 15 | 65,864,222  | <i>MAP2K5</i>   | T | C | 0.031 | 0.004 | 1.91E-17  |
| rs758747   | 16 | 3,567,359   | <i>NLRC3</i>    | T | C | 0.023 | 0.004 | 7.47E-10  |
| rs12446632 | 16 | 19,842,890  | <i>GPRC5B</i>   | G | A | 0.040 | 0.005 | 1.48E-18  |
| rs2650492  | 16 | 28,240,912  | <i>SBK1</i>     | A | G | 0.021 | 0.004 | 1.92E-09  |
| rs3888190  | 16 | 28,796,987  | <i>ATP2A1</i>   | A | C | 0.031 | 0.003 | 3.14E-23  |
| rs9925964  | 16 | 31,037,396  | <i>KAT8</i>     | A | G | 0.019 | 0.003 | 8.11E-10  |
| rs1558902  | 16 | 52,361,075  | <i>FTO</i>      | A | T | 0.082 | 0.003 | 7.51E-153 |
| rs1000940  | 17 | 5,223,976   | <i>RABEP1</i>   | G | A | 0.019 | 0.003 | 1.28E-08  |
| rs12940622 | 17 | 76,230,166  | <i>RPTOR</i>    | G | A | 0.018 | 0.003 | 2.49E-09  |
| rs1808579  | 18 | 19,358,886  | <i>C18orf8</i>  | C | T | 0.017 | 0.003 | 4.17E-08  |
| rs7243357  | 18 | 55,034,299  | <i>GRP</i>      | T | G | 0.022 | 0.004 | 3.86E-08  |
| rs6567160  | 18 | 55,980,115  | <i>MC4R</i>     | C | T | 0.056 | 0.004 | 3.93E-53  |
| rs17724992 | 19 | 18,315,825  | <i>PGPEP1</i>   | A | G | 0.019 | 0.004 | 3.42E-08  |
| rs29941    | 19 | 39,001,372  | <i>KCTD15</i>   | G | A | 0.018 | 0.003 | 2.41E-08  |
| rs2075650  | 19 | 50,087,459  | <i>TOMM40</i>   | A | G | 0.026 | 0.005 | 1.25E-08  |
| rs2287019  | 19 | 50,894,012  | <i>QPCTL</i>    | C | T | 0.036 | 0.004 | 4.59E-18  |
| rs3810291  | 19 | 52,260,843  | <i>ZC3H4</i>    | A | G | 0.028 | 0.004 | 4.81E-15  |

This meta-analysis of 322,154 European-descent individuals identified 77 loci at genome-wide significance defined as  $p < 5 \times 10^{-8}$  (Locke et al. 2015).

<sup>a</sup>Beta and SE were previously reported in the GWAS.

**Table S10. Genome-wide meta-analysis results of 29 blood pressure loci.**

| SNP        | CHR | Position    | Gene                    | Risk_allele | Other_allele | Beta <sup>a</sup> | SE <sup>a</sup> | P-value  |
|------------|-----|-------------|-------------------------|-------------|--------------|-------------------|-----------------|----------|
| rs2932538  | 1   | 113,018,066 | <i>MOV10</i>            | G           | A            | 4.86E-02          | 9.50E-03        | 2.89E-07 |
| rs13082711 | 3   | 27,512,913  | <i>SLC4A7</i>           | C           | T            | 3.47E-02          | 9.70E-03        | 3.56E-04 |
| rs419076   | 3   | 170,583,580 | <i>MECOM</i>            | T           | C            | 3.09E-02          | 8.60E-03        | 3.06E-04 |
| rs13107325 | 4   | 103,407,732 | <i>SLC39A8</i>          | C           | T            | 1.05E-01          | 2.08E-02        | 4.89E-07 |
| rs13139571 | 4   | 156,864,963 | <i>GUCY1A3-GUCY1B3</i>  | C           | A            | 4.20E-02          | 0.01            | 2.50E-05 |
| rs1173771  | 5   | 32,850,785  | <i>NPR3-C5orf23</i>     | G           | A            | 6.20E-02          | 9.90E-03        | 3.23E-10 |
| rs11953630 | 5   | 157,777,980 | <i>EBF1</i>             | C           | T            | 5.22E-02          | 1.00E-02        | 1.68E-07 |
| rs1799945  | 6   | 26,199,158  | <i>HFE</i>              | G           | C            | 9.47E-02          | 1.48E-02        | 1.76E-10 |
| rs805303   | 6   | 31,724,345  | <i>BAT2-BAT5</i>        | G           | A            | 5.37E-02          | 8.30E-03        | 1.12E-10 |
| rs4373814  | 10  | 18,459,978  | <i>CACNB2(5')</i>       | C           | G            | 4.63E-02          | 8.60E-03        | 8.53E-08 |
| rs932764   | 10  | 95,885,930  | <i>PLCE1</i>            | G           | A            | 5.51E-02          | 9.60E-03        | 9.35E-09 |
| rs7129220  | 11  | 10,307,114  | <i>ADM</i>              | A           | G            | 4.45E-02          | 1.36E-02        | 1.11E-03 |
| rs633185   | 11  | 100,098,748 | <i>FLJ32810-TMEM133</i> | C           | G            | 7.02E-02          | 1.07E-02        | 5.41E-11 |
| rs2521501  | 15  | 89,238,392  | <i>FURIN-FES</i>        | T           | A            | 5.87E-02          | 1.18E-02        | 7.02E-07 |
| rs17608766 | 17  | 42,368,270  | <i>GOSR2</i>            | C           | T            | 2.47E-02          | 1.41E-02        | 8.00E-02 |
| rs1327235  | 20  | 10,917,030  | <i>JAG1</i>             | G           | A            | 3.42E-02          | 9.80E-03        | 4.57E-04 |
| rs6015450  | 20  | 57,184,512  | <i>GNAS-EDN3</i>        | G           | A            | 1.10E-01          | 1.46E-02        | 4.18E-14 |
| rs17367504 | 1   | 11,785,365  | <i>MTHFR-NPPB</i>       | A           | G            | 1.03E-01          | 1.63E-02        | 2.34E-10 |
| rs3774372  | 3   | 41,852,418  | <i>ULK4</i>             | C           | T            | 1.70E-02          | 1.27E-02        | 1.80E-01 |
| rs1458038  | 4   | 81,383,747  | <i>FGF5</i>             | T           | C            | 7.17E-02          | 1.38E-02        | 1.85E-07 |
| rs1813353  | 10  | 18,747,454  | <i>CACNB2(3')</i>       | T           | C            | 7.78E-02          | 1.26E-02        | 6.24E-10 |
| rs4590817  | 10  | 63,137,559  | <i>C10orf107</i>        | G           | C            | 9.61E-02          | 1.68E-02        | 9.82E-09 |
| rs11191548 | 10  | 104,836,168 | <i>CYP17A1-NT5C2</i>    | T           | C            | 9.72E-02          | 2.24E-02        | 1.40E-05 |
| rs381815   | 11  | 16,858,844  | <i>PLEKHA7</i>          | T           | C            | 6.17E-02          | 1.33E-02        | 3.41E-06 |
| rs17249754 | 12  | 88,584,717  | <i>ATP2B1</i>           | G           | A            | 1.26E-01          | 1.63E-02        | 1.13E-14 |
| rs3184504  | 12  | 110,368,991 | <i>SH2B3</i>            | T           | C            | 5.57E-02          | 1.19E-02        | 2.62E-06 |
| rs10850411 | 12  | 113,872,179 | <i>TBX5-TBX3</i>        | T           | C            | 4.50E-02          | 0.01            | 5.20E-06 |
| rs1378942  | 15  | 72,864,420  | <i>CYP1A1-ULK3</i>      | C           | A            | 7.26E-02          | 1.27E-02        | 1.04E-08 |
| rs12940887 | 17  | 44,757,806  | <i>ZNF652</i>           | T           | C            | 4.56E-02          | 8.60E-03        | 1.20E-07 |

This GWAS of 200,000 European descent individuals identified 29 independent SNPs associated with systolic or diastolic blood pressure or both in a meta-analysis (International Consortium for Blood Pressure Genome-Wide Association et al. 2011).

<sup>a</sup>Beta and SE were previously reported.

**Table S11. The number of omnibus tests with lower p-values than the given significance thresholds (< 0.1, 0.05, or 0.01)**

| Omnibus<br>P-value | Permutation test <sup>a</sup> |      |       | Standard omnibus test <sup>b</sup> |      |       |
|--------------------|-------------------------------|------|-------|------------------------------------|------|-------|
|                    | LRT                           | Wald | Score | LRT                                | Wald | Score |
| < 0.1              | 93                            | 89   | 91    | 491                                | 0    | 121   |
| < 0.05             | 35                            | 36   | 36    | 361                                | 0    | 53    |
| < 0.01             | 8                             | 6    | 7     | 146                                | 0    | 9     |

<sup>a</sup>Permutation test: P-values were the ratios of the number permutations that observe more extreme statistics than the statistic observed in the simulation to the total number of permutations.

<sup>b</sup>Standard omnibus test: P-values were obtained based on chi-square distributions of the test statistics.

The table above showed results from simulations of null hypothesis (no G-E interaction). In each simulation, we generated 1,000 replicates of 5,000 samples with 50 common SNPs (RAF: 1-99%) and 10 exposures that were moderately correlated and normally distributed, assuming some marginal effects of G and E and independence between G and E. Then we calculated test statistics of omnibus test of G-E interactions using the three test statistics (*LRT*, *Wald*, and *Score*). For permutations, we shuffled the outcome group (cases and controls) 1,000 times and derived the empirical p-values.

**Table S12. P-values<sup>a</sup> of six G-E interaction approaches in NHSI, NHSII, and HPFS cohorts**

| <b>Test</b>         | <b>T2D</b> | <b>Obesity</b> | <b>Hypertension</b> | <b>CHD</b> |
|---------------------|------------|----------------|---------------------|------------|
| <b>Omnibus</b>      | 0.023      | 0.005          | 0.346               | 0.506      |
| <b>MultiE-uGRS</b>  | 0.248      | 0.507          | 0.101               | 0.364      |
| <b>MultiE-wGRS</b>  | 0.566      | 0.554          | 0.128               | 0.977      |
| <b>MultiSNP-ERS</b> | 0.047      | 0.215          | 0.010               | 0.571      |
| <b>uGRS-ERS</b>     | 0.473      | 0.038          | 0.048               | 0.437      |
| <b>wGRS-ERS</b>     | 0.681      | 0.031          | 0.020               | 0.523      |

<sup>a</sup>P-values were obtained from 1000 permutations by shuffling case and control status.

We applied the same permutation procedure (in Table S11) to the real data analysis. Using the three cohort data, we performed permutations for six G-E interaction approaches (omnibus, multiE-uGRS, multiE-wGRS, multiSNP-ERS, uGRS-ERS, and wGRS-ERS) using *Score* test statistic.

**Table S13. Type 1 error rates of omnibus test at three  $\alpha$  thresholds using correlated SNPs**

| $\alpha$ threshold | Standard omnibus test |       |       |
|--------------------|-----------------------|-------|-------|
|                    | LRT                   | Wald  | Score |
| < 0.1              | 1.000                 | 0.640 | 0.228 |
| < 0.05             | 1.000                 | 0.640 | 0.131 |
| < 0.01             | 0.998                 | 0.640 | 0.030 |

We simulated 1,000 series data of 5,000 samples with 50 common SNPs in moderate LD (derived from our real cohort data (chr6: 3,944,096 - 3,949,896) after removing SNPs with perfect linkage disequilibrium ( $r^2 = 1.0$ ) and 10 correlated and normally distributed exposures under the null hypothesis (no G-E interaction) in logistic regression, assuming no G-E correlations and 30% prevalence.



## Reference

International Consortium for Blood Pressure Genome-Wide Association, Studies, G. B. Ehret, P. B. Munroe, K. M. Rice, M. Bochud, A. D. Johnson, D. I. Chasman, A. V. Smith, M. D. Tobin, G. C. Verwoert, S. J. Hwang, V. Pihur, P. Vollenweider, P. F. O'Reilly, N. Amin, J. L. Bragg-Gresham, A. Teumer, N. L. Glazer, L. Launer, J. H. Zhao, Y. Aulchenko, S. Heath, S. Sober, A. Parsa, J. Luan, P. Arora, A. Dehghan, F. Zhang, G. Lucas, A. A. Hicks, A. U. Jackson, J. F. Peden, T. Tanaka, S. H. Wild, I. Rudan, W. Igl, Y. Milaneschi, A. N. Parker, C. Fava, J. C. Chambers, E. R. Fox, M. Kumari, M. J. Go, P. van der Harst, W. H. Kao, M. Sjogren, D. G. Vinay, M. Alexander, Y. Tabara, S. Shaw-Hawkins, P. H. Whincup, Y. Liu, G. Shi, J. Kuusisto, B. Tayo, M. Seielstad, X. Sim, K. D. Nguyen, T. Lehtimaki, G. Matullo, Y. Wu, T. R. Gaunt, N. C. Onland-Moret, M. N. Cooper, C. G. Platou, E. Org, R. Hardy, S. Dahgam, J. Palmen, V. Vitart, P. S. Braund, T. Kuznetsova, C. S. Uiterwaal, A. Adeyemo, W. Palmas, H. Campbell, B. Ludwig, M. Tomaszewski, I. Tzoulaki, N. D. Palmer, C. ARDIoGRAM consortium, C. KDGen Consortium, Consortium KidneyGen, consortium EchoGen, Charge-Hf consortium, T. Aspelund, M. Garcia, Y. P. Chang, J. R. O'Connell, N. I. Steinle, D. E. Grobbee, D. E. Arking, S. L. Kardia, A. C. Morrison, D. Hernandez, S. Najjar, W. L. McArdle, D. Hadley, M. J. Brown, J. M. Connell, A. D. Hingorani, I. N. Day, D. A. Lawlor, J. P. Beilby, R. W. Lawrence, R. Clarke, J. C. Hopewell, H. Ongen, A. W. Dreisbach, Y. Li, J. H. Young, J. C. Bis, M. Kahonen, J. Viikari, L. S. Adair, N. R. Lee, M. H. Chen, M. Olden, C. Pattaro, J. A. Bolton, A. Kottgen, S. Bergmann, V. Mooser, N. Chaturvedi, T. M. Frayling, M. Islam, T. H. Jafar, J. Erdmann, S. R. Kulkarni, S. R. Bornstein, J. Grassler, L. Groop, B. F. Voight, J. Kettunen, P. Howard, A. Taylor, S. Guarrera, F. Ricceri, V. Emilsson, A. Plump, I. Barroso, K. T. Khaw, A. B. Weder, S. C. Hunt, Y. V. Sun, R. N. Bergman, F. S. Collins, L. L. Bonnycastle, L. J. Scott, H. M. Stringham, L. Peltonen, M. Perola, E. Vartiainen, S. M. Brand, J. A. Staessen, T. J. Wang, P. R. Burton, M. Soler Artigas, Y. Dong, H. Snieder, X. Wang, H. Zhu, K. K. Lohman, M. E. Rudock, S. R. Heckbert, N. L. Smith, K. L. Wiggins, A. Doumatey, D. Shriner, G. Veldre, M. Viigimaa, S. Kinra, D. Prabhakaran, V. Tripathy, C. D. Langefeld, A. Rosengren, D. S. Thelle, A. M. Corsi, A. Singleton, T. Forrester, G. Hilton, C. A. McKenzie, T. Salako, N. Iwai, Y. Kita, T. Ogiwara, T. Ohkubo, T. Okamura, H. Ueshima, S. Umemura, S. Eyheramendy, T. Meitinger, H. E. Wichmann, Y. S. Cho, H. L. Kim, J. Y. Lee, J. Scott, J. S. Sehmi, W. Zhang, B. Hedblad, P. Nilsson, G. D. Smith, A. Wong, N. Narisu, A. Stancakova, L. J. Raffel, J. Yao, S. Kathiresan, C. J. O'Donnell, S. M. Schwartz, M. A. Ikram, W. T. Longstreth, Jr., T. H. Mosley, S. Seshadri, N. R. Shrine, L. V. Wain, M. A. Morken, A. J. Swift, J. Laitinen, I. Prokopenko, P. Zitting, J. A. Cooper, S. E. Humphries, J. Danesh, A. Rasheed, A. Goel, A. Hamsten, H. Watkins, S. J. Bakker, W. H. van Gilst, C. S. Janipalli, K. R. Mani, C. S. Yajnik, A. Hofman, F. U. Mattace-Raso, B. A. Oostra, A. Demirkan, A. Isaacs, F. Rivadeneira, E. G. Lakatta, M. Orru, A. Scuteri, M. Ala-Korpela, A. J. Kangas, L. P. Lyytikainen, P. Soininen, T. Tukiainen, P. Wurtz, R. T. Ong, M. Dorr, H. K. Kroemer, U. Volker, H. Volzke, P. Galan, S. Hercberg, M. Lathrop,

- D. Zelenika, P. Deloukas, M. Mangino, T. D. Spector, G. Zhai, J. F. Meschia, M. A. Nalls, P. Sharma, J. Terzic, M. V. Kumar, M. Denniff, E. Zukowska-Szczechowska, L. E. Wagenknecht, F. G. Fowkes, F. J. Charchar, P. E. Schwarz, C. Hayward, X. Guo, C. Rotimi, M. L. Bots, E. Brand, N. J. Samani, O. Polasek, P. J. Talmud, F. Nyberg, D. Kuh, M. Laan, K. Hveem, L. J. Palmer, Y. T. van der Schouw, J. P. Casas, K. L. Mohlke, P. Vineis, O. Raitakari, S. K. Ganesh, T. Y. Wong, E. S. Tai, R. S. Cooper, M. Laakso, D. C. Rao, T. B. Harris, R. W. Morris, A. F. Dominiczak, M. Kivimaki, M. G. Marmot, T. Miki, D. Saleheen, G. R. Chandak, J. Coresh, G. Navis, V. Salomaa, B. G. Han, X. Zhu, J. S. Kooner, O. Melander, P. M. Ridker, S. Bandinelli, U. B. Gyllensten, A. F. Wright, J. F. Wilson, L. Ferrucci, M. Farrall, J. Tuomilehto, P. P. Pramstaller, R. Elosua, N. Soranzo, E. J. Sijbrands, D. Altshuler, R. J. Loos, A. R. Shuldiner, C. Gieger, P. Meneton, A. G. Uitterlinden, N. J. Wareham, V. Gudnason, J. I. Rotter, R. Rettig, M. Uda, D. P. Strachan, J. C. Witteman, A. L. Hartikainen, J. S. Beckmann, E. Boerwinkle, R. S. Vasan, M. Boehnke, M. G. Larson, M. R. Jarvelin, B. M. Psaty, G. R. Abecasis, A. Chakravarti, P. Elliott, C. M. van Duijn, C. Newton-Cheh, D. Levy, M. J. Caulfield, and T. Johnson. 2011. 'Genetic variants in novel pathways influence blood pressure and cardiovascular disease risk', *Nature*, 478: 103-9.
- Locke, A. E., B. Kahali, S. I. Berndt, A. E. Justice, T. H. Pers, F. R. Day, C. Powell, S. Vedantam, M. L. Buchkovich, J. Yang, D. C. Croteau-Chonka, T. Esko, T. Fall, T. Ferreira, S. Gustafsson, Z. Kutalik, J. Luan, R. Magi, J. C. Randall, T. W. Winkler, A. R. Wood, T. Workalemahu, J. D. Faul, J. A. Smith, J. H. Zhao, W. Zhao, J. Chen, R. Fehrmann, A. K. Hedman, J. Karjalainen, E. M. Schmidt, D. Absher, N. Amin, D. Anderson, M. Beekman, J. L. Bolton, J. L. Bragg-Gresham, S. Buyske, A. Demirkan, G. Deng, G. B. Ehret, B. Feenstra, M. F. Feitosa, K. Fischer, A. Goel, J. Gong, A. U. Jackson, S. Kanoni, M. E. Kleber, K. Kristiansson, U. Lim, V. Lotay, M. Mangino, I. M. Leach, C. Medina-Gomez, S. E. Medland, M. A. Nalls, C. D. Palmer, D. Pasko, S. Pechlivanis, M. J. Peters, I. Prokopenko, D. Shungin, A. Stancakova, R. J. Strawbridge, Y. J. Sung, T. Tanaka, A. Teumer, S. Trompet, S. W. van der Laan, J. van Setten, J. V. Van Vliet-Ostaptchouk, Z. Wang, L. Yengo, W. Zhang, A. Isaacs, E. Albrecht, J. Arnlöv, G. M. Arscott, A. P. Attwood, S. Bandinelli, A. Barrett, I. N. Bas, C. Bellis, A. J. Bennett, C. Berne, R. Blagieva, M. Bluher, S. Boehringer, L. L. Bonnycastle, Y. Bottcher, H. A. Boyd, M. Bruinenberg, I. H. Caspersen, Y. I. Chen, R. Clarke, E. W. Daw, A. J. M. de Craen, G. Delgado, M. Dimitriou, A. S. F. Doney, N. Eklund, K. Estrada, E. Eury, L. Folkersen, R. M. Fraser, M. E. Garcia, F. Geller, V. Giedraitis, B. Gigante, A. S. Go, A. Golay, A. H. Goodall, S. D. Gordon, M. Gorski, H. J. Grabe, H. Grallert, T. B. Grammer, J. Grassler, H. Gronberg, C. J. Groves, G. Gusto, J. Haessler, P. Hall, T. Haller, G. Hallmans, C. A. Hartman, M. Hassinen, C. Hayward, N. L. Heard-Costa, Q. Helmer, C. Hengstenberg, O. Holmen, J. J. Hottenga, A. L. James, J. M. Jeff, A. Johansson, J. Jolley, T. Juliusdottir, L. Kinnunen, W. Koenig, M. Koskenvuo, W. Kratzer, J. Laitinen, C. Lamina, K. Leander, N. R. Lee, P. Lichtner, L. Lind, J. Lindstrom, K. S. Lo, S. Lobbens, R. Lorbeer, Y. Lu, F. Mach, P. K. E. Magnusson, A. Mahajan, W. L. McArdle, S. McLachlan, C. Menni, S. Merger, E. Mihailov, L. Milani, A. Moayyeri, K. L. Monda, M. A. Morken, A. Mulas, G. Muller, M. Muller-

Nurasyid, A. W. Musk, R. Nagaraja, M. M. Nothen, I. M. Nolte, S. Pilz, N. W. Rayner, F. Renstrom, R. Rettig, J. S. Ried, S. Ripke, N. R. Robertson, L. M. Rose, S. Sanna, H. Scharnagl, S. Scholtens, F. R. Schumacher, W. R. Scott, T. Seufferlein, J. Shi, A. V. Smith, J. Smolonska, A. V. Stanton, V. Steinthorsdottir, K. Stirrups, H. M. Stringham, J. Sundstrom, M. A. Swertz, A. J. Swift, A. C. Syvanen, S. T. Tan, B. O. Tayo, B. Thorand, G. Thorleifsson, J. P. Tyrer, H. W. Uh, L. Vandenput, F. C. Verhulst, S. H. Vermeulen, N. Verweij, J. M. Vonk, L. L. Waite, H. R. Warren, D. Waterworth, M. N. Weedon, L. R. Wilkens, C. Willenborg, T. Wilsgaard, M. K. Wojczynski, A. Wong, A. F. Wright, Q. Zhang, Study LifeLines Cohort, E. P. Brennan, M. Choi, Z. Dastani, A. W. Drong, P. Eriksson, A. Franco-Cereceda, J. R. Gadin, A. G. Gharavi, M. E. Goddard, R. E. Handsaker, J. Huang, F. Karpe, S. Kathiresan, S. Keildson, K. Kiryluk, M. Kubo, J. Y. Lee, L. Liang, R. P. Lifton, B. Ma, S. A. McCarroll, A. J. McKnight, J. L. Min, M. F. Moffatt, G. W. Montgomery, J. M. Murabito, G. Nicholson, D. R. Nyholt, Y. Okada, J. R. B. Perry, R. Dorajoo, E. Reinmaa, R. M. Salem, N. Sandholm, R. A. Scott, L. Stolk, A. Takahashi, T. Tanaka, F. M. van 't Hooft, A. A. E. Vinkhuyzen, H. J. Westra, W. Zheng, K. T. Zondervan, A. DIPOGen Consortium, Agen-Bmi Working Group, C. ARDIOGRAMplusC4D Consortium, C. KDGen Consortium, Glgc, Icbp, Magic Investigators, Ther Consortium Mu, M. IGen Consortium, Page Consortium, Consortium ReproGen, Genie Consortium, Consortium International Endogene, A. C. Heath, D. Arveiler, S. J. L. Bakker, J. Beilby, R. N. Bergman, J. Blangero, P. Bovet, H. Campbell, M. J. Caulfield, G. Cesana, A. Chakravarti, D. I. Chasman, P. S. Chines, F. S. Collins, D. C. Crawford, L. A. Cupples, D. Cusi, J. Danesh, U. de Faire, H. M. den Ruijter, A. F. Dominiczak, R. Erbel, J. Erdmann, J. G. Eriksson, M. Farrall, S. B. Felix, E. Ferrannini, J. Ferrieres, I. Ford, N. G. Forouhi, T. Forrester, O. H. Franco, R. T. Gansevoort, P. V. Gejman, C. Gieger, O. Gottesman, V. Gudnason, U. Gyllenstein, A. S. Hall, T. B. Harris, A. T. Hattersley, A. A. Hicks, L. A. Hindorff, A. D. Hingorani, A. Hofman, G. Homuth, G. K. Hovingh, S. E. Humphries, S. C. Hunt, E. Hypponen, T. Illig, K. B. Jacobs, M. R. Jarvelin, K. H. Jockel, B. Johansen, P. Jousilahti, J. W. Jukema, A. M. Jula, J. Kaprio, J. J. P. Kastelein, S. M. Keinanen-Kiukaanniemi, L. A. Kiemeney, P. Knekt, J. S. Kooner, C. Kooperberg, P. Kovacs, A. T. Kraja, M. Kumari, J. Kuusisto, T. A. Lakka, C. Langenberg, L. L. Marchand, T. Lehtimaki, V. Lyssenko, S. Mannisto, A. Marette, T. C. Matise, C. A. McKenzie, B. McKnight, F. L. Moll, A. D. Morris, A. P. Morris, J. C. Murray, M. Nelis, C. Ohlsson, A. J. Oldehinkel, K. K. Ong, P. A. F. Madden, G. Pasterkamp, J. F. Peden, A. Peters, D. S. Postma, P. P. Pramstaller, J. F. Price, L. Qi, O. T. Raitakari, T. Rankinen, D. C. Rao, T. K. Rice, P. M. Ridker, J. D. Rioux, M. D. Ritchie, I. Rudan, V. Salomaa, N. J. Samani, J. Saramies, M. A. Sarzynski, H. Schunkert, P. E. H. Schwarz, P. Sever, A. R. Shuldiner, J. Sinisalo, R. P. Stolk, K. Strauch, A. Tonjes, D. A. Tregouet, A. Tremblay, E. Tremoli, J. Virtamo, M. C. Vohl, U. Volker, G. Waeber, G. Willemsen, J. C. Witteman, M. C. Zillikens, L. S. Adair, P. Amouyel, F. W. Asselbergs, T. L. Assimes, M. Bochud, B. O. Boehm, E. Boerwinkle, S. R. Bornstein, E. P. Bottinger, C. Bouchard, S. Cauchi, J. C. Chambers, S. J. Chanock, R. S. Cooper, P. I. W. de Bakker, G. Dedoussis, L. Ferrucci, P. W.

- Franks, P. Froguel, L. C. Groop, C. A. Haiman, A. Hamsten, J. Hui, D. J. Hunter, K. Hveem, R. C. Kaplan, M. Kivimaki, D. Kuh, M. Laakso, Y. Liu, N. G. Martin, W. Marz, M. Melbye, A. Metspalu, S. Moebus, P. B. Munroe, I. Njolstad, B. A. Oostra, C. N. A. Palmer, N. L. Pedersen, M. Perola, L. Perusse, U. Peters, C. Power, T. Quertermous, R. Rauramaa, F. Rivadeneira, T. E. Saaristo, D. Saleheen, N. Sattar, E. E. Schadt, D. Schlessinger, P. E. Slagboom, H. Snieder, T. D. Spector, U. Thorsteinsdottir, M. Stumvoll, J. Tuomilehto, A. G. Uitterlinden, M. Uusitupa, P. van der Harst, M. Walker, H. Wallaschofski, N. J. Wareham, H. Watkins, D. R. Weir, H. E. Wichmann, J. F. Wilson, P. Zanen, I. B. Borecki, P. Deloukas, C. S. Fox, I. M. Heid, J. R. O'Connell, D. P. Strachan, K. Stefansson, C. M. van Duijn, G. R. Abecasis, L. Franke, T. M. Frayling, M. I. McCarthy, P. M. Visscher, A. Scherag, C. J. Willer, M. Boehnke, K. L. Mohlke, C. M. Lindgren, J. S. Beckmann, I. Barroso, K. E. North, E. Ingelsson, J. N. Hirschhorn, R. J. F. Loos, and E. K. Speliotes. 2015. 'Genetic studies of body mass index yield new insights for obesity biology', *Nature*, 518: 197-206.
- Morris, A. P., B. F. Voight, T. M. Teslovich, T. Ferreira, A. V. Segre, V. Steinthorsdottir, R. J. Strawbridge, H. Khan, H. Grallert, A. Mahajan, I. Prokopenko, H. M. Kang, C. Dina, T. Esko, R. M. Fraser, S. Kanoni, A. Kumar, V. Lagou, C. Langenberg, J. Luan, C. M. Lindgren, M. Muller-Nurasyid, S. Pechlivanis, N. W. Rayner, L. J. Scott, S. Wiltshire, L. Yengo, L. Kinnunen, E. J. Rossin, S. Raychaudhuri, A. D. Johnson, A. S. Dimas, R. J. Loos, S. Vedantam, H. Chen, J. C. Florez, C. Fox, C. T. Liu, D. Rybin, D. J. Couper, W. H. Kao, M. Li, M. C. Cornelis, P. Kraft, Q. Sun, R. M. van Dam, H. M. Stringham, P. S. Chines, K. Fischer, P. Fontanillas, O. L. Holmen, S. E. Hunt, A. U. Jackson, A. Kong, R. Lawrence, J. Meyer, J. R. Perry, C. G. Platou, S. Potter, E. Rehnberg, N. Robertson, S. Sivapalaratnam, A. Stancakova, K. Stirrups, G. Thorleifsson, E. Tikkanen, A. R. Wood, P. Almgren, M. Atalay, R. Benediktsson, L. L. Bonnycastle, N. Burt, J. Carey, G. Charpentier, A. T. Crenshaw, A. S. Doney, M. Dorkhan, S. Eddins, V. Emilsson, E. Eury, T. Forsen, K. Gertow, B. Gigante, G. B. Grant, C. J. Groves, C. Guiducci, C. Herder, A. B. Hreidarsson, J. Hui, A. James, A. Jonsson, W. Rathmann, N. Klopp, J. Kravic, K. Krjutskov, C. Langford, K. Leander, E. Lindholm, S. Lobbens, S. Mannisto, G. Mirza, T. W. Muhleisen, B. Musk, M. Parkin, L. Rallidis, J. Saramies, B. Sennblad, S. Shah, G. Sigurdsson, A. Silveira, G. Steinbach, B. Thorand, J. Trakalo, F. Veglia, R. Wennauer, W. Winckler, D. Zabaneh, H. Campbell, C. van Duijn, A. G. Uitterlinden, A. Hofman, E. Sijbrands, G. R. Abecasis, K. R. Owen, E. Zeggini, M. D. Trip, N. G. Forouhi, A. C. Syvanen, J. G. Eriksson, L. Peltonen, M. M. Nothen, B. Balkau, C. N. Palmer, V. Lyssenko, T. Tuomi, B. Isomaa, D. J. Hunter, L. Qi, Consortium Wellcome Trust Case Control, Glucose Meta-Analyses of, Investigators Insulin-related traits Consortium, ANthropometric Traits Consortium Genetic Investigation of, Consortium Asian Genetic Epidemiology Network-Type 2 Diabetes, Consortium South Asian Type 2 Diabetes, A. R. Shuldiner, M. Roden, I. Barroso, T. Wilsgaard, J. Beilby, K. Hovingh, J. F. Price, J. F. Wilson, R. Rauramaa, T. A. Lakka, L. Lind, G. Dedoussis, I. Njolstad, N. L. Pedersen, K. T. Khaw, N. J. Wareham, S. M. Keinanen-Kiukkaanniemi, T. E. Saaristo, E. Korpi-Hyovalti, J. Saltevo, M. Laakso, J. Kuusisto, A. Metspalu, F. S. Collins, K. L.

- Mohlke, R. N. Bergman, J. Tuomilehto, B. O. Boehm, C. Gieger, K. Hveem, S. Cauchi, P. Froguel, D. Baldassarre, E. Tremoli, S. E. Humphries, D. Saleheen, J. Danesh, E. Ingelsson, S. Ripatti, V. Salomaa, R. Erbel, K. H. Jockel, S. Moebus, A. Peters, T. Illig, U. de Faire, A. Hamsten, A. D. Morris, P. J. Donnelly, T. M. Frayling, A. T. Hattersley, E. Boerwinkle, O. Melander, S. Kathiresan, P. M. Nilsson, P. Deloukas, U. Thorsteinsdottir, L. C. Groop, K. Stefansson, F. Hu, J. S. Pankow, J. Dupuis, J. B. Meigs, D. Altshuler, M. Boehnke, M. I. McCarthy, D. IAbetes Genetics Replication, and Consortium Meta-analysis. 2012. 'Large-scale association analysis provides insights into the genetic architecture and pathophysiology of type 2 diabetes', *Nat Genet*, 44: 981-90.
- Nikpay, M., A. Goel, H. H. Won, L. M. Hall, C. Willenborg, S. Kanoni, D. Saleheen, T. Kyriakou, C. P. Nelson, J. C. Hopewell, T. R. Webb, L. Zeng, A. Dehghan, M. Alver, S. M. Armasu, K. Auro, A. Bjorres, D. I. Chasman, S. Chen, I. Ford, N. Franceschini, C. Gieger, C. Grace, S. Gustafsson, J. Huang, S. J. Hwang, Y. K. Kim, M. E. Kleber, K. W. Lau, X. Lu, Y. Lu, L. P. Lyytikainen, E. Mihailov, A. C. Morrison, N. Pervjakova, L. Qu, L. M. Rose, E. Salfati, R. Saxena, M. Scholz, A. V. Smith, E. Tikkanen, A. Uitterlinden, X. Yang, W. Zhang, W. Zhao, M. de Andrade, P. S. de Vries, N. R. van Zuydam, S. S. Anand, L. Bertram, F. Beutner, G. Dedoussis, P. Frossard, D. Gauguier, A. H. Goodall, O. Gottesman, M. Haber, B. G. Han, J. Huang, S. Jalilzadeh, T. Kessler, I. R. Konig, L. Lannfelt, W. Lieb, L. Lind, C. M. Lindgren, M. L. Lokki, P. K. Magnusson, N. H. Mallick, N. Mehra, T. Meitinger, F. U. Memon, A. P. Morris, M. S. Nieminen, N. L. Pedersen, A. Peters, L. S. Rallidis, A. Rasheed, M. Samuel, S. H. Shah, J. Sinisalo, K. E. Stirrups, S. Trompet, L. Wang, K. S. Zaman, D. Ardisino, E. Boerwinkle, I. B. Borecki, E. P. Bottinger, J. E. Buring, J. C. Chambers, R. Collins, L. A. Cupples, J. Danesh, I. Demuth, R. Elosua, S. E. Epstein, T. Esko, M. F. Feitosa, O. H. Franco, M. G. Franzosi, C. B. Granger, D. Gu, V. Gudnason, A. S. Hall, A. Hamsten, T. B. Harris, S. L. Hazen, C. Hengstenberg, A. Hofman, E. Ingelsson, C. Iribarren, J. W. Jukema, P. J. Karhunen, B. J. Kim, J. S. Kooner, I. J. Kullo, T. Lehtimaki, R. J. F. Loos, O. Melander, A. Metspalu, W. Marz, C. N. Palmer, M. Perola, T. Quertermous, D. J. Rader, P. M. Ridker, S. Ripatti, R. Roberts, V. Salomaa, D. K. Sanghera, S. M. Schwartz, U. Seedorf, A. F. Stewart, D. J. Stott, J. Thiery, P. A. Zalloua, C. J. O'Donnell, M. P. Reilly, T. L. Assimes, J. R. Thompson, J. Erdmann, R. Clarke, H. Watkins, S. Kathiresan, R. McPherson, P. Deloukas, H. Schunkert, N. J. Samani, and M. Farrall. 2015. 'A comprehensive 1,000 Genomes-based genome-wide association meta-analysis of coronary artery disease', *Nat Genet*, 47: 1121-30.
